# Supplementary material for: Truncated C-terminus of fibrillin-1 induces Marfanoid-progeroid-lipodystrophy (MPL) syndrome in rabbit
Source: PubMed Central journal article supplement (PMC5963856; doi:10.1242/dmm.031542), 2018-04-09
Supplement: dmm-11-031542-s1.pdf [file dmm-11-031542-s1.pdf]

## SUPPLEMENTAL FILES

## Supplemental figures

Figure S1.

```

#F0-1 TCTGGAATGGGCATGGGCCAGGAGGCCCGGAGCCACCTGT // GTTACGAGTGTAAAGATCAATGGCTACCCCAAACGGGGCAGG WT
#F0-2 TCTGGAATGGGCATGGG-----AGGCCCGGAGCCACCTGT // GTTACGAGTGTAAAGATCAATGGCTACCCCAAAC-----GG -12
TCTGGAATGGGCATGGGCCAGGAGGCCCGGAGCCACCTGT // GTTACGAGTGTAAAGATCAATGGCTACCCCAAAC-----GG -6
#F0-3 TCTGGAATGG----- // -----GCAGG -108
TCTGGAATGGGCATGGG----- // -----AATG-----GGGCAGG -95
#F0-4 TCTGGAATGGGCATGGGCCAGGAGGCCCGGAGCCACCTGT // GTTACGAGTGTAAAGATCAATGGCTACCCCAAACGGGGCAGG WT
TCTGGAATGGGCATGGG----- // -----GGCAGG -100
#F0-5 TCTGGAATGGGCATGGGCCAGGAGGCCCGGAGCCACCTGT // GTTACGAGTGTAAAGATCAATGGCTACCCCAAACG---CAGG -3
TCTGGAATGGGCATGGG----- // -----GGCAGG -100
TCTGGAATGGGCATGGGCCAGGAGGCCCGGAGCCACCTGT // GTTACGAGTGTAAAGATCAATGGCTACCCCAAAC-----GG -6
#F0-6 TCTGGAATGGGCATGGGCCAGGAGGCCCGGAGCCACCTGT // GTTACGAGTGTAAAGATCAATGGCTACCCCAAACGG---CAGG -2
TCTGGAATGGGCATGGG---GAGG---CCCGGAGCCACCTGT // GTTACGAGTGTAAAGATCAATGGCTACCCCAAACGG---CAGG -7
#F0-7 TCTGGAATGGGCATGGG-----AGCCACCTGT // GTTACGAGTGTAAAGATCAATGGCTACCCCAAAT---GGCAGG -18+1
TCTGGAATGGGCATGGGCCAGGAGGCCCGGAGCCACCTGT // GTTACGAGTGTAAAGATCAATGGCTACCCCAAACG---GCAGG -2
TCTGGAATGGGCATGGGCCAGGAGGCCCGGAGCCACCTGT // GTTACGAGTGTAAAGATCAATGGCTACCCCAAACG---GAGG -3
TCTGGAATGGGCATGGG----- // -----GGCAGG -100
#F0-8 TCTGGAATGGGCATGGG----- // -----GGGCAGG -99
TCTGGAATGGGCATGGGCCAGGAGGCCCGGAGCCACCTGT // ACGAGTGTAAAGATCAATGGCTACCCCAAACGTTTGGGCAGG +3
TCTGGAATGGGCATGGG----- // -----GGCAGG -100
#F0-9 TCTGGAATGG----- // -----CAGG -109
TCTGGAATGGGCATGGGCCAGGAGGCCCGGAGCCACCTGT // GTTACGAGTGTAAAGATCAATGGCTACCCCAAACG---GCAGG -2
#F0-10 TCTGGAATGGGCATGGGCCAGGAGGCCCGGAGCCACCTGT // GTTACGAGTGTAAAGATCAATGGCTACCCCAAACGGG---CAGG -1
TCTGGAATGG----- // -----GCAGG -108
#F0-11 TCTGGAATGGGCATGGGCCAGGAGGCCCGGAGCCACCTGT // GTTACGAGTGTAAAGATCAATGGCTACCCCAAACGGGGCAGG WT
#F0-12 TCTGGAATGGGCATGGGCC----- // -----AACGGGGCAGG -92
TCTGGAATGGGCATGGGCCAGGAGGCCCGGAGCCACCTGT // TAAGATCAATGGCTACCCCAAACGG-----GAA -13
TCTGGAATGGGC-----CGGAGGAGGCCCGGAGCCACCTGT // GTTACGAGTGTAAAGATCAATGGCTACCCCAAAC---GGCAGG -6+1
#F0-13 TCTGGAATGGGCATGGG----- // -----ACGGGGCAGG -96
#F0-14 TCTGGAATGGGCATGGGCCAGGAGGCCCGGAGCCACCTGT // GTTACGAGTGTAAAGATCAATGGCTACCC-----ACGGCAGG -5+2
#F0-15 TCTGGAATGGGCATGGGCCAGGAGGCCCGGAGCCACCTGT // GTTACGAGTGTAAAGATCAATGGCTACCCCAAACGGGGCAGG WT
TCTGGAATGGGCATGGGCCAGGAGGCCCGGAGCCACCTGT // GTTACGAGTGTAAAGATCAATGGCTACCCCAAACGG---CAGG -2
#F0-16 TCTGGAATGGGCATGG----- // -----AA -107
TCTGGAATGGGCATGGGCCAGGAGGCCCGGAGCCACCTGT // GTTACGAGTGTAAAGATCAATGGCTACCCCAAACG---CAGG -3
TCTGGAATGGGCATGGGCCAGGAGGCCCGGAGCCACCTGT // GTTACGAGTGTAAAGATCAATGGCTACCCCAAACGG---CAGG -2
#F0-17 TCTGGAATGGGCATGGGCCAGGAGGCCCGGAGCCACCTGT // GTTACGAGTGTAAAGATCAATGGCTACCCCAAACGG---AGG -3
TCTGGAATGGGCATGGGC-----GGCCCGGAGCCACCTGT // GTTACGAGTGTAAAGATCAATGGCTACCCCAAACGG-----6
#F0-18 TCTGGAATGGGCATGGG----- // -----AACGGGGCAGG -95
TCTGGAATGGGCATGGGCCAGGAGGCCCGGAGCCACCTGT // GTTACGAGTGTAAAGATCAATGGCTACCCCAAACG---GCAGG -2
TCTGGAATGGGCAT----- // -----GGGGCAGG -101
TCTGGAATGGGCATGGGCCAGGAGGCCCGGAGCCACCTGT // GTTACGAGTGTAAAGATCAATGGCTACCCCAAAC-----GG -6
#F0-19 TCTGGAATGGGCATGGGCCAGGAGGCCCGGAGCCACCTGT // GTTACGAGTGTAAAGATCAATGGCTACCCCAAACGG---CAGG -2
TCTGGAATGGGCATGGGCCAGGAGGCCCGGAGCCACCTGT // GTTACGAGTGTAAAGATCAATGGCTACCCCAAACGGGGCA-- -35
TCTGGAATGGGCATGGGCCAGGAGGCCCGGAGCCACCTGT // GTTACGAGTGTAAAGATCAATGGCTACCCCAAACGGGGCAGG WT
TCTGGAATGGGCATGGGCCAGGAGGCCCGGAGCCACCTGT // AGTGTAAAGATCAATGGCTACCCCAAACGGGAAGCGGAGGAGG +9
#F0-20 TCTGGAATGGGCAT----- // -----GGCAGG -103
TCTGGAATGGGCATGGG----- // -----TAGG -103+1
#F0-21 TCTGGAATGGGCATGGGCCAGGAGGCCCGGGCCACCTGT // TACGAGTGTAAAGATCAATGGCTACCCCAAACGGAATGCAGG -1+3
TCTGGAATGGGCATGGGC----- // -----AGG -102
TCTGGAATGGGCATGGGCCAGGAGGCCCGGAGCCACCTGT // GTTACGAGTGTAAAGATCAATGGCTACCCCAAACG---GCAGG -2
#F0-22 TCTGGAATGGGCATGGGCCAGGAGGCCCGGAGCCACCTGT // GTTACGAGTGTAAAGATCAATGGCTACCCCAAACGGG---CAGG -1
TCTGGAATGGGCA----- // -----GG -108
#F0-23 TC----- // -----GCAGG -116
#F0-24 TCTGGAATGGGCATGGG----- // -----GCAGG -101
TCTGGAATGGGCATG----- // -----GTAGG -103+2
#F0-25 TCTGGAATGGGCATGGG----- // -----GCAGG -101
TCTGGAATGGGCATGG---CGGAGGAGGCCCGGAGCCACCTGT // GTTACGAGTGTAAAGATCAATGGCTACCCCAAACGGGGCAGG -1
TCTGGAATGGGCATGGGCCAGGAGGCCCGGAGCCACCTGT // GTTACGAGTGTAAAGATCAATGGCTACCCCAAACG---GCAGG -2
#F0-26 TCTGGAATGGGCATGGGCCAGGAGGCCCGGAGCCACCTGT // GTTACGAGTGTAAAGATCAATGGCTACCCCAAACGGGGCAGG WT
TCTGGAATGGGCATGGG----- // ----- -106
#F0-27 TCTGGAATGGGCATGGG----- // -----AACGGGGCAGG -94
#F0-28 TCTGGAATGGGCATGGG-----AGGCCCGGAGCCACCTGT // GTTACGAGTGTAAAGATCAATGGCTACCCCAAACGGG---CAGG -7
TCTGGAATGGGCATGGG---AGGAGGCCCGGAGCCACCTGT // GTTACGAGTGTAAAGATCAATGGCTACCCCAAACGGG---CAGG -4

```

**Figure S1. Generation of *FBNI* knockout F0 rabbits.**

(A) Sanger sequencing of the targeted region of *FBNI* in F0 rabbits. The highlights of sgRNA sequences and PAM sites are green and red, respectively; Bases of indel are in black within sgRNA sequence; WT represents wild-type *FBNI* sequence was detected.

**Figure S2.**

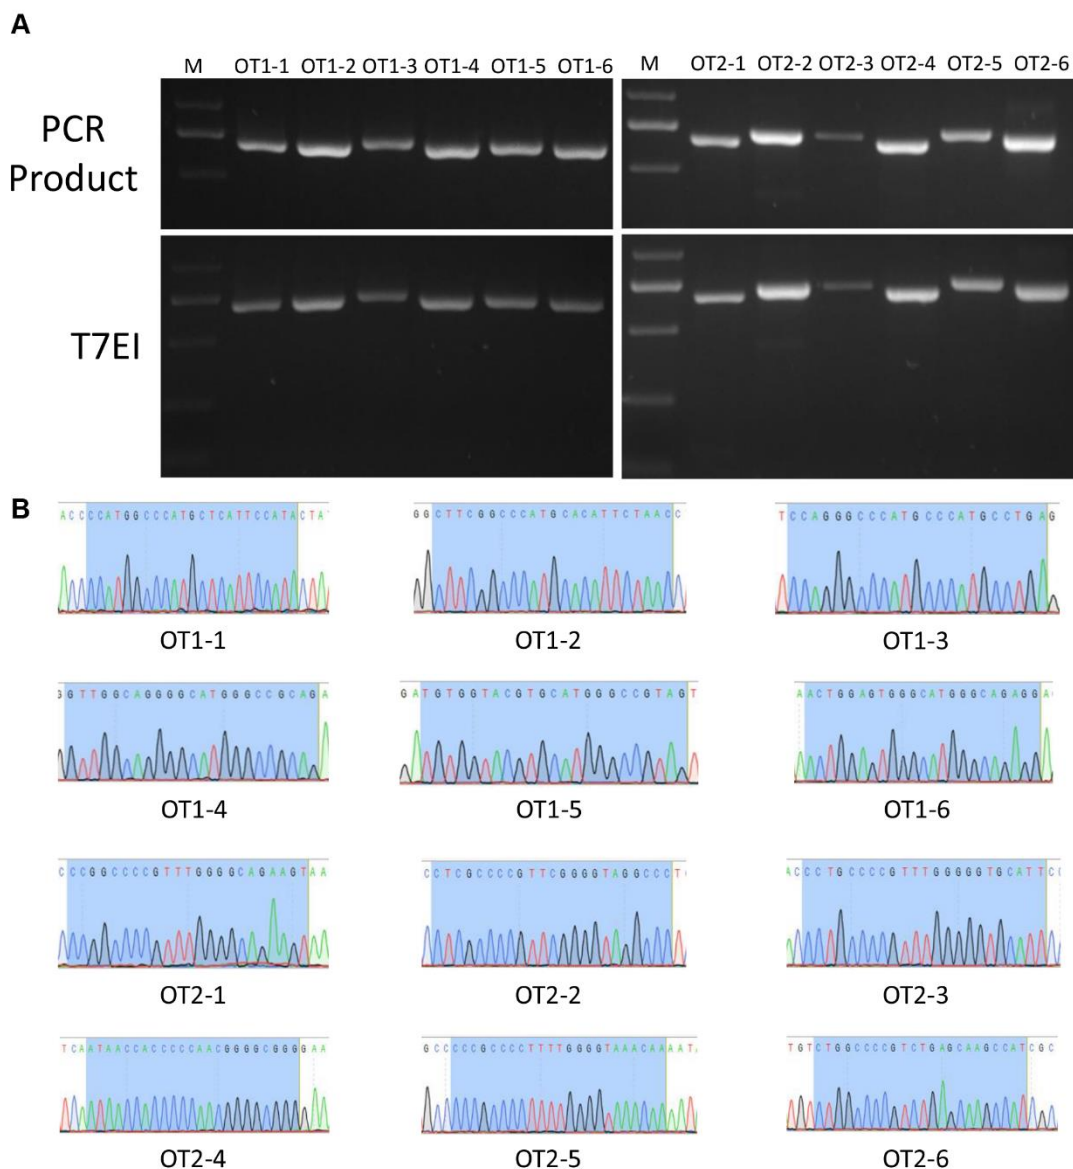

**Figure S2. Off-target detection of *FBNI* KO rabbits.**

(A) T7E1 analysis of POTS for sgRNA1 and sgRNA2. M, DL2000; OT1 represent POTS of sgRNA1; OT2 represent POTS of sgRNA2. (B) Chromatogram sequence analysis of 12 POTS for sgRNA1 and sgRNA2 using PCR products. The sequences of the POTS and the PAM are

represented in shadow.

Figure S3.

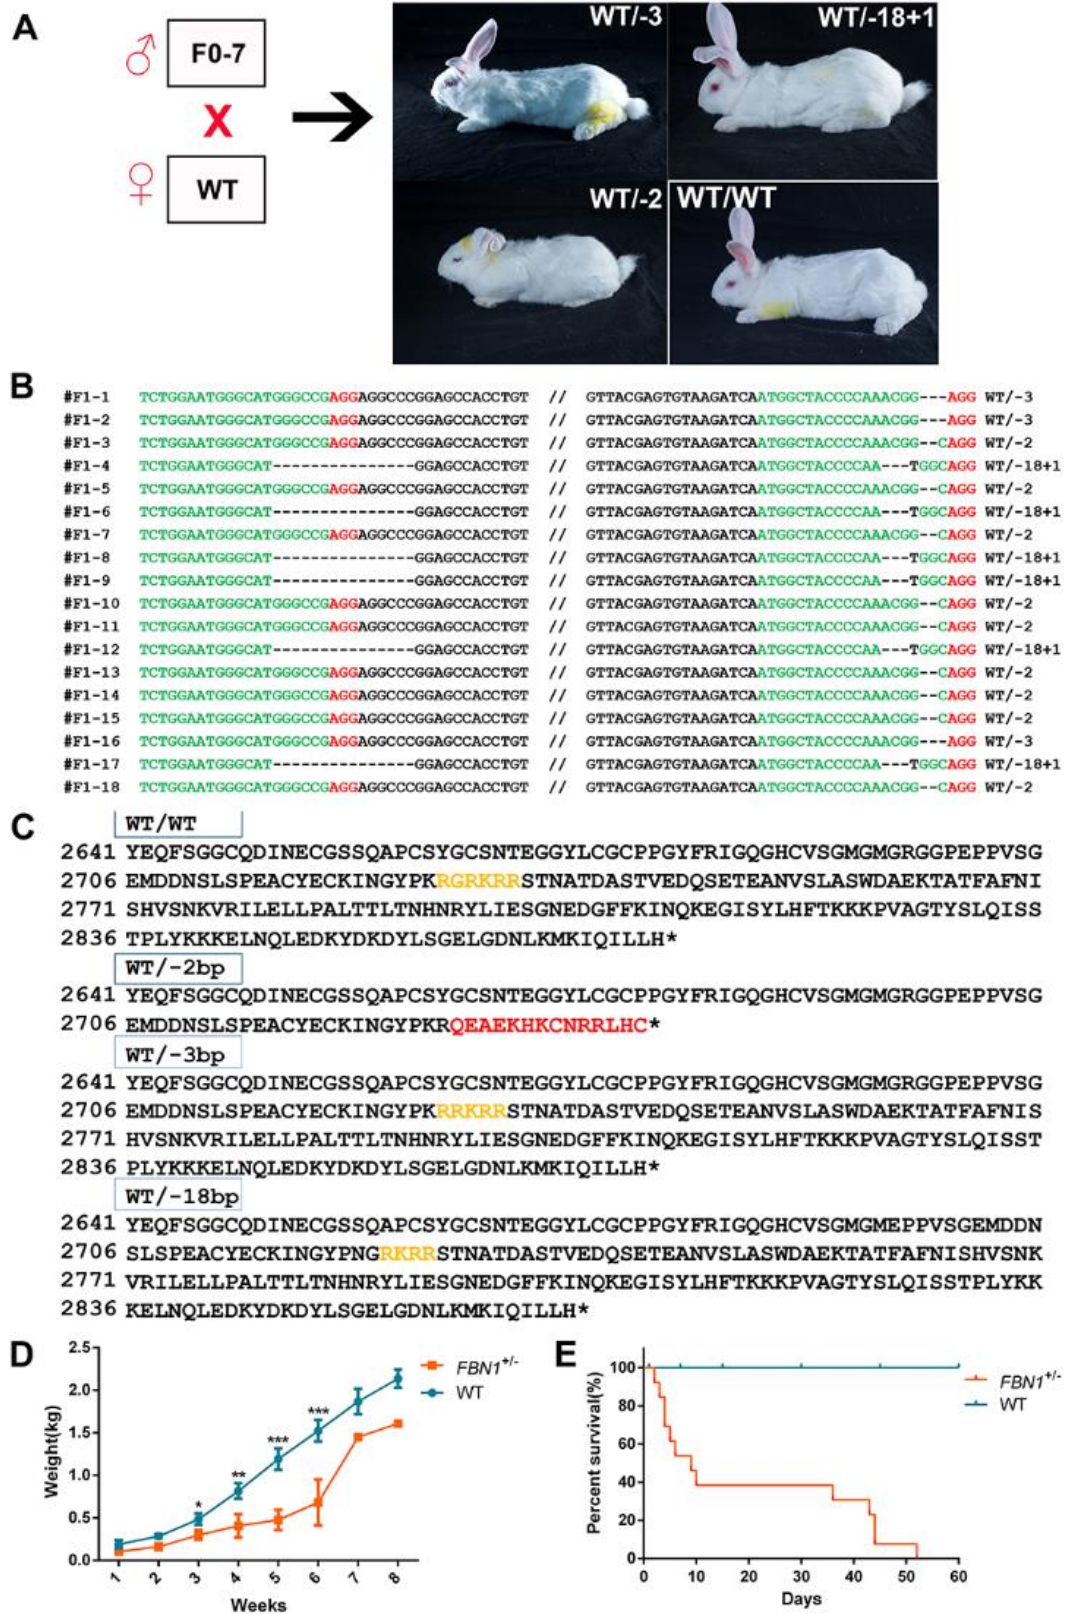

**Figure S3. Hereditary of *FBNI* KO rabbits.**

(A) Generation of F1 rabbits by #F0-7 mated with WT rabbits. (B) T-cloning sequence analysis of the *FBNI* Het rabbits. Target sites of the two sgRNA sequences, sgRNA1 and sgRNA2, are highlighted in green, protospacer-adjacent motif (PAM) sequence is highlighted in red; WT represents gene sequence of rabbit. (C) The predicted protein sequences of *FBNI* Het rabbits, showing the premature termination codon (PTC) mutation in *FBNI*. (D) The weight comparison shows the growth retarded were determined in the *FBNI* Het rabbits (n=12). (E) Survival curves shows the high mortality of *FBNI* Het rabbits (WT, n=6; *FBNI* Het, n=12). Data are presented as mean  $\pm$  SEM and analyzed using student's t-tests with Graphpad Prism software 6.0. \*p < 0.05; \*\* p < 0.01; \*\*\* p < 0.001. Scale bars: 50  $\mu$ m.



**Supplemental tables****Table S1: Generation of *FBNI* knockout rabbits using CRISPR/Cas9**

| <b>Recipient</b> | <b>gRNA/Cas9<br/>(ng/μl)</b> | <b>No. embryos<br/>transferred</b> | <b>No. newborns<br/>(%)</b> | <b>No. mutant<br/>rabbits (%)</b> |
|------------------|------------------------------|------------------------------------|-----------------------------|-----------------------------------|
| 1                | 30/200                       | 56                                 | 3(5)                        | 2(67)                             |
| 2                | 30/200                       | 56                                 | 10(18)                      | 9(90)                             |
| 3                | 30/200                       | 42                                 | 10(24)                      | 10(100)                           |
| 4                | 30/200                       | 43                                 | 5(12)                       | 5(100)                            |
| Total (average)  |                              | 197                                | 28(14)                      | 26(93)                            |

**Table S2: Genotype and phenotype in F1 generation rabbits**

| NO.F1 generation | Genotype | Transcription is terminated prematurely |        | Phenotype |
|------------------|----------|-----------------------------------------|--------|-----------|
|                  |          |                                         | or not |           |
| #1-1             | WT/-100  |                                         | ✓      | ✓         |
| #1-2             | WT/-3    |                                         | ✗      | ✗         |
| #1-3             | WT/-3    |                                         | ✗      | ✗         |
| #1-4             | WT/-2    |                                         | ✓      | ✓         |
| #1-5             | WT/-18+1 |                                         | ✗      | ✗         |
| #1-6             | WT/-2    |                                         | ✓      | ✓         |
| #1-7             | WT/-18+1 |                                         | ✗      | ✗         |
| #1-8             | WT/-2    |                                         | ✓      | ✓         |
| #2-1             | WT/-18+1 |                                         | ✗      | ✗         |
| #2-2             | WT/-18+1 |                                         | ✗      | ✗         |
| #2-3             | WT/-2    |                                         | ✓      | ✓         |
| #2-4             | WT/-2    |                                         | ✓      | ✓         |
| #2-5             | WT/-18+1 |                                         | ✗      | ✗         |
| #2-6             | WT/-100  |                                         | ✓      | ✓         |
| #2-7             | WT/-2    |                                         | ✓      | ✓         |
| #3-1             | WT/-2    |                                         | ✓      | ✓         |
| #3-2             | WT/-2    |                                         | ✓      | ✓         |
| #3-3             | WT/-3    |                                         | ✗      | ✗         |
| #3-4             | WT/-18+1 |                                         | ✗      | ✗         |
| #3-5             | WT/-100  |                                         | ✓      | ✓         |
| #3-6             | WT/-2    |                                         | ✓      | ✓         |

**Table S3: Oligonucleotide used for sgRNA, PCR and qPCR.**

| NO. | Name       | Primers     | Sequence(5'-3')          | Produce size (bp) |
|-----|------------|-------------|--------------------------|-------------------|
| 1   | SgRNA1     | gRNA-1-F    | TAGGTCTGGAATGGGCATGGGCCG | 20                |
|     |            | gRNA-1-R    | AAACCGGCCCATGCCATTCCAGA  |                   |
| 2   | SgRNA2     | gRNA-2-F    | TAGGATGGCTACCCCAAACGGGGC | 20                |
|     |            | gRNA-2-R    | AAACGCCCCGTTTGGGGTAGCCAT |                   |
| 3   | FBN1       | FBN1-F      | TGCCTCACATCTAGCTCCCT     | 745               |
|     |            | FBN1-R      | AGAAACTCCAGAAAGCCCCG     |                   |
| 4   | qPCR-FBN1  | FBN1-qPCR-F | TAGCTCCTTCCTGTGGCTCC     | 90                |
|     |            | FBN1-qPCR-R | GGCATAGACAGTGGTCGTC      |                   |
| 5   | qPCR-GAPDH | GAPDH-F     | ATCCATTCATTGACCTCCACTAC  | 179               |
|     |            | GAPDH-R     | GTACTGGGCACCAGCATCAC     |                   |

1 and 2 were used for the construction of sgRNA expression plasmids; 3 was used for the PCR mutation detection; 4 and 5 were used for the qPCR detection.

**Table S4. 12 potential off-target sites examined by PCR and primers used for list.**

| sgRNA     | Potential Off Target Site | Number of mismatch | Position         | PCR Primer                                            |
|-----------|---------------------------|--------------------|------------------|-------------------------------------------------------|
| <b>s1</b> | TATGGAATGAGCATGGGCCA TGG  | 3                  | chr1:-130169142  | F: ATCTCCGAAGCCAACAGAAG<br>R: TCTGGCATGGTAAGGAGAAAC   |
|           | GTTAGAATGTGCATGGGCCG AAG  | 4                  | chr12:-93730077  | F: GTCAAGTGGCAATGGGTTTC<br>R: CCACAAGATGTCCCTGAGATG   |
|           | TCAGGCATGGGCATGGGCC C TGG | 3                  | chr9:-64499502   | F: ACACCATTGGCCCAACTAA<br>R: TTAGGAAAGTACAACGGGCTAC   |
|           | GTTGGCAGGGGCATGGGCCG CAG  | 4                  | chr17:+81565876  | F: GGGATACCACCTTGTACCAATAA<br>R: GAAGAGGGCTTGATCCACAA |
|           | TGTGGTACGTGCATGGGCCG TAG  | 4                  | chr13:+141566422 | F: AACTGTGACAGGGAATCCTAAC<br>R: CCTGTAGCTCACACACAACTA |
|           | ACTGGAGTGGGCATGGGCCAG AGG | 3                  | chr20:+32533869  | F: GAGCCAGGATGTGGTTTCTT<br>R: CCTGTATCTGCTGGGTTGTG    |
| <b>s2</b> | ACTTCTGCCCCAACGGGGC CGG   | 4                  | chr19:-39585556  | F: CGCAGGAAGCAATGGAAATG<br>R: TGTGTGACAGGGCAAAGAG     |
|           | GGGCTACCCG AACGGGGC GAG   | 4                  | chr7:-43683785   | F: CACACACAGTCTCTGTTCAC<br>R: TTCCTTCTGCACACCATGTC    |
|           | AATGCACCCCCAACGGGGC AGG   | 4                  | chrUN0:-1338853  | F: CATGTCTGTCTCTGCCTTAT<br>R: TCTCTCCCTGCTAACTCTTTG   |
|           | ATAACCACCCCAACGGGGC GGG   | 4                  | chr8:+14988562   | F: CAAGACACAAAGAAGCACCATC<br>R: CCCACCAAGTTATGGTCTGTA |
|           | TTGTTACCCAAAAGGGGC GGG    | 4                  | chr1:-18383438   | F: AGAGCAGCTTAGGAACCTTIG<br>R: TCCTGTCTCCCTGCAGTTT    |
|           | ATGGCTGCTCAGACGGGGC CAG   | 4                  | chr3:-24783207   | F: AGGGAGTGTCCAGGAGTAAA<br>R: TAGCAAGCAGAGAACACTTCAG  |
